# Supplementary material for: Hospital strain and Covid-19 fatality: analysis of English nationwide surveillance data
Source: bioRxiv or medRxiv preprint supplement (doi:10.1101/2022.09.27.22280401), 2022-09-27
Supplement: Supplementary file [file media-1.pdf]

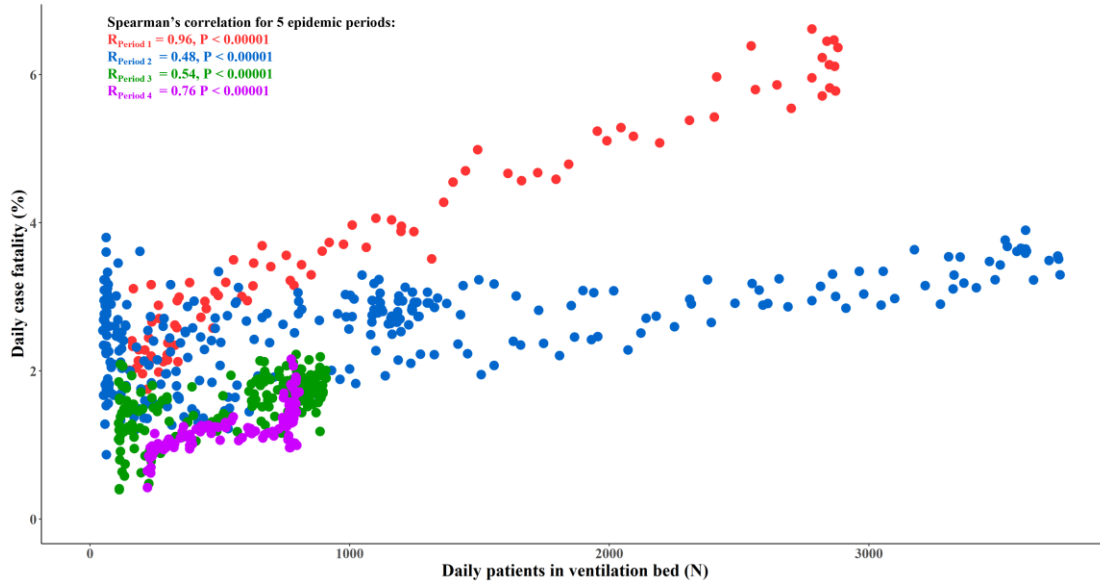

**Appendix Figure 1. The correlation of COVID-19 fatality with patients currently in ventilation beds during the 4 epidemic periods in England.**

**Appendix Table 1. Regression coefficients and relative increase in daily case fatality for each predictor in the multivariate log linear regression model in Table 3.**

| <b>Variables</b>                                                                                           | <b>Regression coefficients<br/>(95% CI)</b> | <b>Relative increase<br/>(95% CI)</b> | <b>P-value</b> |
|------------------------------------------------------------------------------------------------------------|---------------------------------------------|---------------------------------------|----------------|
| <b>Study periods</b>                                                                                       |                                             |                                       |                |
| Period 1                                                                                                   | -0.005(-0.113,0.103)                        | 0.995(0.893,1.108)                    | 0.9262         |
| Period 2                                                                                                   | Ref (0.000)                                 | Ref (1.000)                           | -              |
| Period 3                                                                                                   | -0.180(-0.284,-0.076)                       | 0.835(0.753,0.927)                    | 0.0007         |
| Period 4                                                                                                   | 0.544(0.347,0.741)                          | 1.723(1.414,2.098)                    | <0.0001        |
| <b>Daily number of patients in hospital (per 1000 increase) in period 2</b>                                | 0.014(0.128,0.015)                          | 1.014(1.137,1.015)                    | <0.0001        |
| <b>Interaction term between daily number of patients in hospital (per 1000 increase) and study periods</b> |                                             |                                       |                |
| Period 1                                                                                                   | 0.047(0.043,0.052)                          | -                                     | <0.0001        |
| Period 2                                                                                                   | Ref (0.000)                                 | -                                     | -              |
| Period 3                                                                                                   | 0.106(0.088,0.123)                          | -                                     | <0.0001        |
| Period 4                                                                                                   | -0.019(-0.028,-0.011)                       | -                                     | <0.0001        |
| <b>Vaccination score (per 10% increase)</b>                                                                | -0.051(-0.059,-0.044)                       | 0.95(0.943,0.957)                     | <0.0001        |
| <b>Admission rate (per 10% increase)</b>                                                                   | -0.019(-0.040,0.002)                        | 0.981(0.961,1.002)                    | 0.0826         |
| <b>Percentage of death outside hospital (per 10% increase)</b>                                             | -0.018(-0.045,0.009)                        | 0.982(0.956,1.009)                    | 0.1914         |

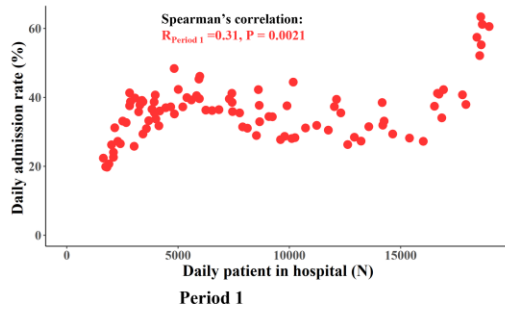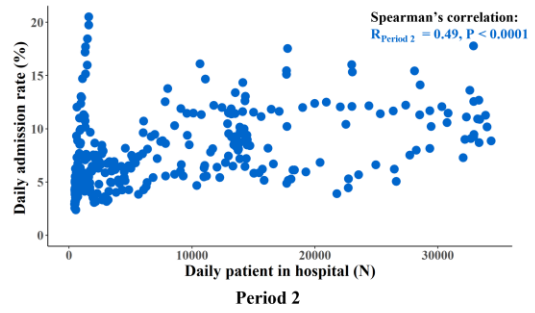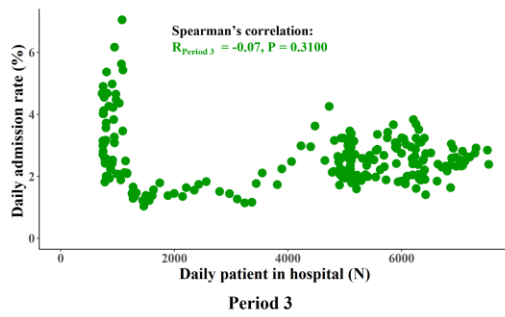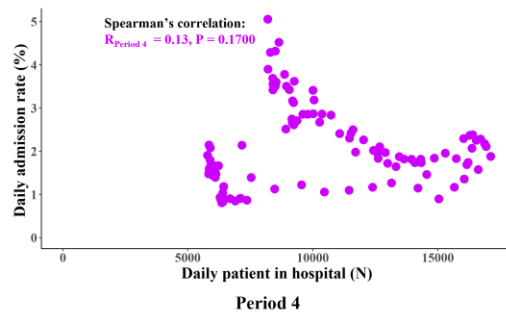

**Appendix Figure 2. The correlation of daily admission rate with patients currently in hospital during the 4 study periods.**

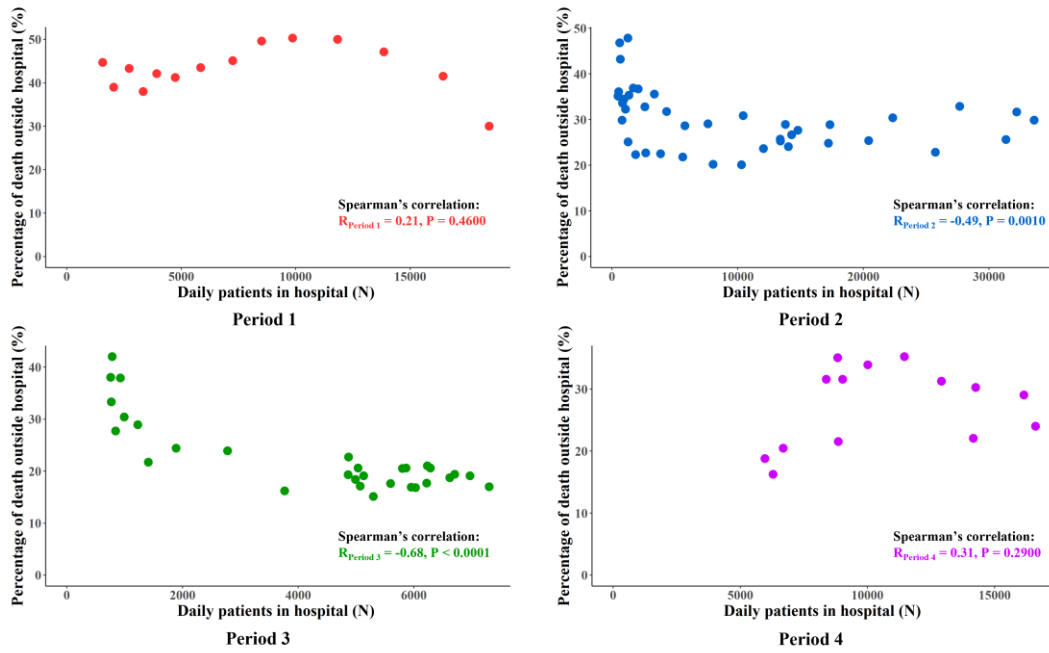

**Appendix Figure 3. The correlation of the percentage of deaths outside hospitals with daily patients currently in hospital during the 4 study periods (on a weekly basis).**
